# Supplementary material for: Plasmid-mediated quinolone resistance among extended-spectrum β-lactamase-producing Escherichia coli and Klebsiella pneumoniae isolated from hospitalized patients, hospital environment and wastewaters in Cameroon
Source: Research Square preprint supplement (doi:10.21203/rs.3.rs-5856415/v1), 2025-03-24
Supplement: Supplementary file 1 [file 6f7b007bde46cec63759050e.docx]

**Plasmid-mediated quinolone resistance among extended-spectrum β-lactamase-producing *Escherichia coli* and *Klebsiella pneumoniae* isolated from hospitalized patients, hospital environment and wastewaters in Cameroon**

Patrice Landry Koudoum1, Raspail Carrel Founou1,2,3, Luria Leslie Founou2,4,5,6, Megane Daina Foueyem1, Giresse Wilfried Guemkam1, Richard Deuguen1, Gisele Ateba Nke7,8, HortenseGonsu9,10& Simeon Pierre Choukem11, 12

1Department of Microbiology- Haematology and Immunology, Faculty of Medicine and Pharmaceutical Sciences, University of Dschang, Dschang, Cameroon;

2Antimicrobial Research Unit, School of Health Sciences, College of Health Sciences, University of KwaZulu-Natal, Durban 4000, South Africa;

3 Antimicrobial Resistance and Infectious Disease (ARID) Research Unit, Research Institute of Centre of Expertise and Biological Diagnostic of Cameroon (CEDBCAM-RI), Yaoundé, Cameroon;

4Reproductive, Maternal, Newborn and Child Health (ReMARCH) Research Unit, Research

Institute of the Centre of Expertise and Biological Diagnostic of Cameroon (CEDBCAM-RI); Yaoundé, Cameroon;

5Bioinformatics & Applied Machine Learning Research Unit, EDEN Biosciences Research Institute (EBRI), EDEN Foundation, Yaoundé Cameroon;

6 Infection & Global Health Division, School of Medicine, University of St Andrews, St Andrews, United Kingdom;

7Yaoundé Central Hospital, Yaoundé Cameroon;

8Faculty of Medicine and Pharmaceutical Sciences, University of Douala, Douala, Cameroon;

9Faculty of Medicine and Biomedical Sciences, University of Yaoundé 1, Yaoundé, Cameroon;

10University Teaching Hospital of Yaoundé, Yaoundé, Cameroon;

11Department of Internal Medicine and Specialties, Faculty of Medicine and Pharmaceutical Sciences, University of Dschang, Dschang, Cameroon;

12Health and Human Development (2HD) Research Network, Douala, Cameroon.

**#Corresponding author**

Dr Raspail Carrel Founou

Email: czangue@yahoo.fr

Keywords: Hospital-acquired infection, Hospital environment, Extended-Spectrum β-Lactamase, *Enterobacterales*, Plasmid-Mediated Quinolone Resistance, One Health.

Running title: Plasmid-mediated quinolone resistance among ESBL-*E. coli* and *K. pneumoniae* in Yaoundé, Cameroon.

**IST OF SUPPLEMENTARY TABLES AND FIGURES**

**Supplementary figure S1:** Extended-Spectrum β-Lactamase-Enterobacterales (ESBL-E) count (in log10CFU/mL) in hospital wastewaters. ICU= Intensive Care Unit, MAT= Maternity, NEO= Neonatology, URO= Urology, NEU= Neurology EMER= Emergency, SURG= Surgery, INF= Influent, EFF= Effluent and KESC= Klebsiella, Enterobacter, Serratia and Citrobacter.


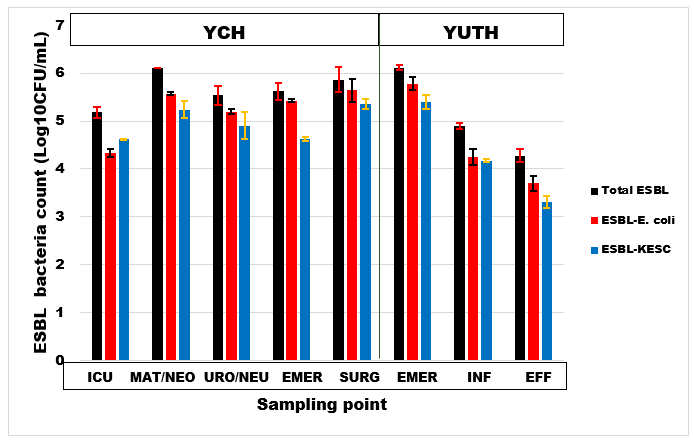


**Supplementary table S1:** Resistance patterns of ESBL-E. coli

| **Resistance pattern** | **No ATB** | **No families** | **HP** | **HEV** | **HWW** |
| --- | --- | --- | --- | --- | --- |
| AMC-ATM-CHL-CIP-CN-CTX-FEP-FOS-FOX-MEM-LEV-SXT/TMP-TET | 13 | 7 | 1 | 0 | 0 |
| AMC-ATM-CHL-CIP-CN-CTX-FEP-FOS-FOX-LEV-SXT/TMP-TET | 12 | 7 | 3 | 0 | 2 |
| AMC-ATM-CHL-CIP-CN-CTX-FEP-FOX-MEM-LEV-SXT/TMP-TET | 12 | 6 | 0 | 0 | 1 |
| AMC-ATM-CHL-CIP-CTX-FEP-FOS-FOX-MEM-LEV-SXT/TMP-TET | 12 | 6 | 1 | 0 | 0 |
| AMC-ATM-CHL-CIP-CN-CTX-FEP-FOX-LEV-SXT/TMP-TET | 11 | 6 | 1 | 0 | 0 |
| AMC-ATM-CHL-CIP-CN-CTX-FEP-FOS-FOX-SXT/TMP-TET | 11 | 7 | 1 | 0 | 0 |
| AMC-ATM-CHL-CIP-CN-CTX-FEP-MEM-LEV-SXT/TMP-TET | 11 | 6 | 0 | 0 | 2 |
| AMC-ATM-CHL-CIP-CTX-FEP-FOS-FOX-LEV-SXT/TMP-TET | 11 | 6 | 1 | 0 | 0 |
| AMC-ATM-CHL-CIP-CTX-FEP-FOX-MEM-LEV-SXT/TMP-TET | 11 | 5 | 0 | 0 | 1 |
| AMC-ATM-CIP-CN-CTX-FEP-FOS-FOX-LEV-SXT/TMP-TET | 11 | 6 | 3 | 0 | 0 |
| AMC-ATM-CIP-CN-CTX-FEP-FOX-MEM-LEV-SXT/TMP-TET | 11 | 5 | 0 | 1 | 3 |
| AMC-ATM-CIP-CTX-FEP-FOS-FOX-MEM-LEV-SXT/TMP-TET | 11 | 5 | 0 | 0 | 1 |
| AMC-ATM-CHL-CIP-CN-CTX-FEP-FOS-FOX-TET | 10 | 5 | 1 | 0 | 0 |
| AMC-ATM-CHL-CIP-CN-CTX-FEP-LEV-SXT/TMP-TET | 10 | 6 | 0 | 0 | 2 |
| AMC-ATM-CHL-CIP-CTX-FEP-FOS-FOX-SXT/TMP-TET | 10 | 6 | 1 | 0 | 0 |
| AMC-ATM-CIP-CN-CTX-FEP-FOS-FOX-LEV-SXT/TMP | 10 | 5 | 0 | 0 | 1 |
| AMC-ATM-CIP-CN-CTX-FEP-FOS-FOX-SXT/TMP-TET | 10 | 6 | 0 | 0 | 1 |
| AMC-ATM-CIP-CN-CTX-FEP-FOS-LEV-SXT/TMP-TET | 10 | 6 | 1 | 0 | 0 |
| AMC-ATM-CIP-CN-CTX-FEP-FOX-LEV-SXT/TMP-TET | 10 | 5 | 1 | 0 | 2 |
| AMC-ATM-CIP-CTX-FEP-FOS-FOX-LEV-SXT/TMP-TET | 10 | 5 | 2 | 0 | 0 |
| AMC-ATM-CIP-CTX-FEP-FOX-MEM-LEV-SXT/TMP-TET | 10 | 4 | 0 | 1 | 3 |
| AMC-ATM-CHL-CIP-CTX-FEP-FOX-SXT/TMP-TET | 9 | 5 | 0 | 0 | 1 |
| AMC-ATM-CHL-CIP-CTX-FEP-LEV-SXT/TMP-TET | 9 | 5 | 0 | 1 | 0 |
| AMC-ATM-CIP-CN-CTX-FEP-FOS-LEV-TET | 9 | 5 | 1 | 0 | 0 |
| AMC-ATM-CIP-CN-CTX-FEP-FOX-LEV-SXT/TMP | 9 | 4 | 1 | 0 | 0 |
| AMC-ATM-CIP-CN-CTX-FEP-FOX-SXT/TMP-TET | 9 | 5 | 0 | 1 | 0 |
| AMC-CHL-CIP-FEP-FOS-FOX-LEV-SXT/TMP-TET | 9 | 6 | 1 | 0 | 0 |
| AMC-ATM-CIP-CTX-FEP-FOX-LEV-SXT/TMP-TET | 9 | 4 | 1 | 1 | 5 |
| AMC-ATM-CHL-CIP-CTX-FEP-SXT/TMP-TET | 8 | 5 | 0 | 1 | 0 |
| AMC-ATM-CIP-CTX-FEP-LEV-SXT/TMP-TET | 8 | 4 | 4 | 1 | 5 |
| AMC-ATM-CHL-CTX-FEP-FOX-MEM-TET | 8 | 3 | 0 | 0 | 1 |
| AMC-ATM-CHL-CTX-FEP-FOX-SXT/TMP-TET | 8 | 4 | 0 | 0 | 1 |
| AMC-ATM-CHL-CTX-FEP-SXT/TMP-TET | 7 | 4 | 0 | 1 | 0 |
| AMC-ATM-CHL-CIP-CTX-FEP-TET | 7 | 4 | 1 | 0 | 0 |
| AMC-ATM-CIP-CTX-FEP-LEV-TET | 7 | 3 | 0 | 0 | 3 |
| AMC-ATM-CIP-CTX-FEP-SXT/TMP-TET | 7 | 4 | 0 | 0 | 1 |
| AMC-ATM-CTX-FEP-FOS-SXT/TMP-TET | 7 | 4 | 0 | 0 | 1 |
| Nº=Number, HP=Hospitalized patients, ATB=Antibiotics, HEV=Hospital Environment, HWW=Hospital wastewater. AMC=amoxicillin-clavulanic acid, FEP=cefepime, CTX=cefotaxime, ATM=aztreonam, TET=tetracycline, SXT/TMP=trimethoprim-sulfamethoxazole, CIP=ciprofloxacin, LEV=levofloxacin, FOX=cefoxitin, CN=gentamicin, CHL= chloramphenicol, MEM=meropenem, and FOS=Fosfomycin. | | | | | |

| **Supplementary table S2**: Resistance patterns of ESBL-K. pneumoniae | | | | | |
| --- | --- | --- | --- | --- | --- |
| **Resistance pattern** | **Nº ATB** | **Nº families** | **HP** | **HEV** | **HWW** |
| AMC-ATM-CHL-CIP-CN-CTX-FEP-FOS-FOX-MEM-LEV-SXT/TMP-TET | 13 | 7 | 4 | 0 | 3 |
| AMC-ATM-CHL-CIP-CN-CTX-FEP-FOS-FOX-LEV-SXT/TMP-TET | 12 | 7 | 3 | 0 | 2 |
| AMC-ATM-CHL-CIP-CN-CTX-FEP-FOS-FOX-MEM-LEV-TET | 12 | 6 | 1 | 0 | 0 |
| AMC-ATM-CIP-CN-CTX-FEP-FOS-FOX-MEM-LEV-SXT/TMP-TET | 12 | 6 | 1 | 0 | 1 |
| AMC-ATM-CHL-CIP-CN-CTX-FEP-FOX-MEM-LEV-SXT/TMP-TET | 12 | 6 | 3 | 2 | 4 |
| AMC-ATM-CHL-CIP-CTX-FEP-FOS-FOX-MEM-LEV-SXT/TMP-TET | 12 | 7 | 0 | 1 | 0 |
| AMC-ATM-CHL-CIP-CN-CTX-FEP-FOX-MEM-SXT/TMP-TET | 11 | 6 | 0 | 0 | 1 |
| AMC-ATM-CHL-CIP-CN-CTX-FEP-MEM-LEV-SXT/TMP-TET | 11 | 7 | 0 | 0 | 1 |
| AMC-ATM-CHL-CIP-CTX-FEP-FOS-FOX-LEV-SXT/TMP-TET | 11 | 6 | 0 | 0 | 1 |
| AMC-ATM-CHL-CIP-CN-CTX-FEP-FOS-FOX-SXT/TMP-TET | 11 | 7 | 1 | 0 | 0 |
| AMC-ATM-CHL-CIP-CN-CTX-FEP-FOS-LEV-SXT/TMP-TET | 11 | 7 | 2 | 0 | 0 |
| AMC-ATM-CHL-CIP-CN-CTX-FEP-FOX-LEV-SXT/TMP-TET | 11 | 6 | 3 | 0 | 0 |
| AMC-ATM-CHL-CIP-CTX-FEP-FOX-MEM-LEV-SXT/TMP-TET | 11 | 5 | 1 | 2 | 4 |
| AMC-ATM-CHL-CN-CTX-FEP-FOX-MEM-LEV-SXT/TMP-TET | 11 | 6 | 1 | 0 | 0 |
| AMC-ATM-CIP-CN-CTX-FEP-FOS-FOX-LEV-SXT/TMP-TET | 11 | 5 | 2 | 0 | 0 |
| AMC-ATM-CIP-CN-CTX-FEP-FOX-MEM-LEV-SXT/TMP-TET | 11 | 5 | 1 | 1 | 2 |
| AMC-ATM-CIP-CTX-FEP-FOS-FOX-MEM-LEV-SXT/TMP-TET | 11 | 5 | 0 | 0 | 1 |
| AMC-ATM-CHL-CN-CTX-FEP-FOS-FOX-SXT/TMP-TET | 10 | 6 | 1 | 0 | 0 |
| AMC-ATM-CHL-CIP-CTX-FEP-FOX-LEV-SXT/TMP-TET | 10 | 5 | 0 | 1 | 0 |
| AMC-ATM-CIP-CN-CTX-FEP-FOS-FOX-SXT/TMP-TET | 10 | 6 | 0 | 0 | 1 |
| AMC-ATM-CIP-CTX-FEP-FOX-MEM-LEV-SXT/TMP-TET | 10 | 4 | 0 | 2 | 2 |
| AMC-ATM-CIP-CN-CTX-FEP-FOS-LEV-SXT/TMP-TET | 10 | 6 | 0 | 0 | 1 |
| AMC-ATM-CIP-CN-CTX-FEP-FOX-LEV-SXT/TMP-TET | 10 | 5 | 0 | 0 | 1 |
| AMC-ATM-CN-CTX-FEP-FOS-FOX-LEV-SXT/TMP-TET | 10 | 6 | 1 | 0 | 0 |
| AMC-ATM-CIP-CTX-FEP-FOS-FOX-LEV-SXT/TMP-TET | 10 | 5 | 2 | 1 | 0 |
| AMC-ATM-CHL-CIP-CTX-FEP-FOX-LEV-TET | 9 | 4 | 0 | 1 | 0 |
| AMC-ATM-CHL-CN-CTX-FEP-FOS-SXT/TMP-TET | 9 | 6 | 1 | 0 | 0 |
| AMC-ATM-CHL-CIP-CTX-FEP-LEV-SXT/TMP-TET | 9 | 5 | 0 | 1 | 0 |
| AMC-ATM-CIP-CN-CTX-FEP-LEV-SXT/TMP-TET | 9 | 5 | 1 | 1 | 1 |
| AMC-ATM-CIP-CTX-FEP-FOS-FOX-SXT/TMP-TET | 9 | 5 | 0 | 0 | 1 |
| AMC-ATM-CN-CTX-FEP-FOX-LEV-SXT/TMP-TET | 9 | 5 | 0 | 1 | 0 |
| AMC-ATM-CIP-CTX-FEP-FOS-LEV-SXT/TMP-TET | 9 | 5 | 0 | 1 | 2 |
| AMC-ATM-CIP-CTX-FEP-FOX-LEV-SXT/TMP-TET | 9 | 4 | 0 | 7 | 1 |
| AMC-ATM-CIP-CN-CTX-FEP-SXT/TMP-TET | 8 | 5 | 0 | 0 | 1 |
| AMC-ATM-CIP-CTX-FEP-FOX-SXT/TMP-TET | 8 | 4 | 0 | 1 | 2 |
| AMC-ATM-CIP-CTX-FEP-LEV-SXT/TMP-TET | 8 | 4 | 0 | 1 | 5 |
| AMC-ATM-CIP-CTX-FEP-MEM-SXT/TMP-TET | 8 | 4 | 0 | 0 | 1 |
| AMC-ATM-CN-CTX-FEP-MEM-SXT/TMP-TET | 8 | 4 | 0 | 1 | 0 |
| AMC-ATM-CIP-CTX-FEP-FOS-SXT/TMP | 7 | 4 | 0 | 1 | 0 |
| AMC-ATM-CHL-CTX-FEP-SXT/TMP-TET | 7 | 4 | 0 | 1 | 0 |
| AMC-ATM-CIP-CTX-FEP-LEV-SXT/TMP | 7 | 3 | 0 | 0 | 1 |
| AMC-ATM-CIP-CTX-FEP-SXT/TMP-TET | 7 | 4 | 0 | 1 | 1 |
| AMC-ATM-CTX-FEP-FOX-SXT/TMP-TET | 7 | 3 | 0 | 2 | 0 |
| AMC-CIP-CTX-FEP-FOX-LEV-TET | 7 | 3 | 1 | 0 | 0 |
| AMC-ATM-CN-CTX-FEP-TET | 6 | 3 | 0 | 1 | 0 |
| AMC-ATM-CTX-FEP-FOX-SXT/TMP | 6 | 2 | 0 | 0 | 1 |
| AMC-ATM-CTX-FEP-SXT/TMP-TET | 6 | 3 | 0 | 3 | 0 |
| AMC-CTX-FEP-LEV-SXT/TMP-TET | 6 | 4 | 1 | 0 | 0 |
|  |  |  |  |  |  |
| Nº=Number, ATB=Antibiotics, HP=Hospitalized patients, HEV=Hospital Environment, HWW=Hospital wastewater. AMC=amoxicillin-clavulanic acid, FEP=cefepime, CTX=cefotaxime, ATM=aztreonam, TET=tetracycline, SXT/TMP=trimethoprim-sulfamethoxazole, CIP=ciprofloxacin, LEV=levofloxacin, FOX=cefoxitin, CN=gentamicin, CHL= chloramphenicol, MEM=meropenem, and FOS=Fosfomycin. | | | | | |

**Supplementary table S3:** β-lactamase gene combination frequency in ESBL-E. coli and ESBL-K. pneumoniae

| **β-Lactamase gene combination present** | **Source** | | | **Total** |
| --- | --- | --- | --- | --- |
| **Hospitalized patient** | **Hospital environment** | **Wastewater** |
|  | **ESBL-*Escherichia coli*** | | |  |
|  |  |  |  |  |
| At least one ESBL gene | 21/26 | 10/11 | 36/38 | 67/75 |
| *bla*CTX-M + *bla*SHV | 0 | 1 | 2 | 3 |
| *bla*CTX-M + *bla*TEM | 9 | 4 | 21 | 34 |
| *bla*CTX-M + *bla*TEM + *bla*SHV | 4 | 0 | 0 | 4 |
|  | **ESBL-*Klebsiella pneumoniae*** | | |  |
| At least one ESBL gene | 26/31 | 28/34 | 33/42 | 87/107 |
| *bla*TEM + *bla*SHV | 2 | 0 | 0 | 2 |
| *bla*CTX-M + *bla*SHV | 3 | 6 | 1 | 10 |
| *bla*CTX-M + *bla*TEM | 7 | 9 | 16 | 32 |
| *bla*CTX-M + *bla*TEM + *bla*SHV | 12 | 10 | 9 | 31 |

**Supplementary table S4:** Plasmid-Mediated Quinolone Resistance (PMQR) gene combination frequency detected among ciprofloxacin-resistant ESBL-E. coli and ESBL-K. pneumoniae

| **PMQR gene combinations** | **Hospitalized patient** | **Hospital environment** | **Wastewater** | **Total** |
| --- | --- | --- | --- | --- |
|  | ***Escherichia coli*** | | |  |
| At least one PMQR gene | 21/26 | 5/7 | 29/34 | 55/67 |
| *oqx*A *+ oqx*B | 1 | 0 | 0 | 1 |
| *oqx*B *+ qep*A | 0 | 0 | 1 | 1 |
| *qnr*B *+ qnr*S | 1 | 0 | 0 | 1 |
| *aac(6')-Ib-cr + oqx*A | 1 | 1 | 0 | 2 |
| *aac(6')-Ib-cr + oqx*B | 0 | 0 | 1 | 1 |
| *aac(6')-Ib-cr + qep*A | 1 | 0 | 0 | 1 |
| *aac(6')-Ib-cr + qnr*A *+ qep*A | 1 | 0 | 0 | 1 |
| *aac(6')-Ib-cr + qnr*B | 2 | 0 | 4 | 6 |
| *aac(6')-Ib-cr + qnr*B *+ oqx*A | 1 | 0 | 0 | 1 |
| *aac(6')-Ib-cr + qnr*B *+ qnr*S | 2 | 0 | 0 | 2 |
| *aac(6')-Ib-cr + qnr*S | 0 | 0 | 7 | 7 |
| *aac(6')-Ib-cr + qnr*S *+ oqx*A *+ oqx*B *+ qep*A | 1 | 0 | 0 | 1 |
|  | ***Klebsiella pneumoniae*** | | |  |
| At least one PMQR gene | 22/26 | 22/26 | 36/41 | 80/93 |
| *oqx*A *+ oqx*B | 1 | 0 | 2 | 3 |
| *qnr*B *+ oqx*A | 0 | 0 | 5 | 5 |
| *qnr*B *+ oqx*A *+ oqx*B | 2 | 0 | 0 | 2 |
| *qnr*B *+ oqx*B | 0 | 0 | 1 | 1 |
| *qnr*B *+ qnr*S | 0 | 0 | 1 | 1 |
| *qnr*S *+ oqx*A | 0 | 0 | 2 | 2 |
| *qnr*S *+ oqx*A *+ oqx*B | 0 | 1 | 1 | 2 |
| *qnr*S *+ oqx*B | 0 | 2 | 0 | 2 |
| *aac(6')-Ib-cr + oqx*A | 1 | 1 | 3 | 5 |
| *aac(6')-Ib-cr + oqx*A *+ oqx*B | 2 | 1 | 1 | 4 |
| *aac(6')-Ib-cr + oqx*B | 0 | 0 | 1 | 1 |
| *aac(6')-Ib-cr + qnr*B | 2 | 1 | 3 | 6 |
| *aac(6')-Ib-cr + qnr*B *+ oqx*A | 3 | 2 | 4 | 9 |
| *aac(6')-Ib-cr + qnr*B *+ oqx*A *+ oqx*B | 1 | 1 | 0 | 2 |
| *aac(6')-Ib-cr + qnr*B *+ oqx*A *+ oqx*B *+ qep*A | 0 | 1 | 0 | 1 |
| *aac(6')-Ib-cr + qnr*B *+ oqx*B | 1 | 4 | 0 | 5 |
| *aac(6')-Ib-cr + qnr*B *+ qnr*S *+ oqx*A | 0 | 0 | 2 | 2 |
| *aac(6')-Ib-cr + qnr*S | 1 | 0 | 1 | 2 |
| *aac(6')-Ib-cr + qnr*S *+ oqx*A | 4 | 2 | 0 | 6 |
| *aac(6')-Ib-cr + qnr*S *+ oqx*A *+ oqx*B | 1 | 6 | 0 | 7 |
| *aac(6')-Ib-cr + qnr*S *+ oqx*B | 1 | 0 | 0 | 1 |

**Supplementary table S5:** Frequency of ESBL and PMQR gene combination in ciprofloxacin-resistant *ESBL*-*E. coli*

| **Frequency of ESBL and PMQR gene combination** | **Patient** | **HEV** | **HWW** | **Total** |
| --- | --- | --- | --- | --- |
| At least one ESBL and one PMQR gene | 19/26 | 5/7 | 29/34 | 53/67 |
| *bla*TEM + *aac(6')-Ib-cr* | 1 | 0 | 0 | 1 |
| *bla*TEM + *qnrA* | 1 | 0 | 0 | 1 |
| *bla*CTX-M + *aac(6')-Ib-cr* | 2 | 1 | 4 | 7 |
| *bla*CTX-M + *aac(6')-Ib-cr + qnrA + qepA* | 1 | 0 | 0 | 1 |
| *bla*CTX-M + *aac(6')-Ib-cr + qnrB* | 1 | 0 | 0 | 1 |
| *bla*CTX-M + *aac(6')-Ib-cr + qnrB + qnrS* | 1 | 0 | 0 | 1 |
| *bla*CTX-M + *aac(6')-Ib-cr + qnrS* | 0 | 0 | 4 | 4 |
| *bla*CTX-M + *bla*SHV + *aac(6')-Ib-cr + oqxA* | 0 | 1 | 0 | 1 |
| *bla*CTX-M + *bla*SHV + *aac(6')-Ib-cr + qnrS* | 0 | 0 | 2 | 2 |
| *bla*CTX-M + *bla*TEM + *aac(6')-Ib-cr* | 2 | 2 | 6 | 10 |
| *bla*CTX-M + *bla*TEM + *aac(6')-Ib-cr + oqxB* | 0 | 0 | 1 | 1 |
| *bla*CTX-M + *bla*TEM + *aac(6')-Ib-cr + qepA* | 1 | 0 | 0 | 1 |
| *bla*CTX-M + *bla*TEM + *aac(6')-Ib-cr + qnrB* | 1 | 0 | 4 | 5 |
| *bla*CTX-M + *bla*TEM + *aac(6')-Ib-cr + qnrB + oqxA* | 1 | 0 | 0 | 1 |
| *bla*CTX-M + *bla*TEM + *aac(6')-Ib-cr + qnrB + qnrS* | 1 | 0 | 0 | 1 |
| *bla*CTX-M + *bla*TEM + *aac(6')-Ib-cr + qnrS* | 0 | 0 | 1 | 1 |
| *bla*CTX-M + *bla*TEM + *bla*SHV + *aac(6')-Ib-cr + oqxA* | 1 | 0 | 0 | 1 |
| *bla*CTX-M + *bla*TEM + *bla*SHV + *aac(6')-Ib-cr + qnrS + oqxA + oqxB + qepA* | 1 | 0 | 0 | 1 |
| *bla*CTX-M + *bla*TEM + *bla*SHV + *oqxA* | 1 | 0 | 0 | 1 |
| *bla*CTX-M + *bla*TEM + *bla*SHV + *oqxA* + *oqxB* | 1 | 0 | 0 | 1 |
| *bla*CTX-M + *bla*TEM + *oqxB + qepA* | 0 | 0 | 1 | 1 |
| *bla*CTX-M + *bla*TEM + *qepA* | 0 | 0 | 3 | 3 |
| *bla*CTX-M + *bla*TEM + *qnrB* | 1 | 0 | 1 | 2 |
| *bla*CTX-M + *bla*TEM + *qnrS* | 0 | 1 | 0 | 1 |
| *bla*CTX-M + *qepA* | 0 | 0 | 2 | 2 |
| *bla*CTX-M + *qnrB + qnrS* | 1 | 0 | 0 | 1 |

**Supplementary table S6:**Frequency of ESBL and PMQR gene combination in ciprofloxacin-resistant ESBL*-Klebsiella pneumoniae*

| **Frequency of ESBL and PMQR gene combination** | **Patient** | **HEV** | **HWW** | **Total** |  |
| --- | --- | --- | --- | --- | --- |
| At least one ESBL and one PMQR gene | 24/26 | 21/26 | 30/41 | 75/93 |  |
| *bla*SHV + *aac(6')-Ib-cr + qnrB + qnrS + oqxA* | 0 | 0 | 1 | 1 |  |
| *bla*TEM + *bla*SHV + *aac(6’)-Ib-cr+ qnrS + oqxA* | 1 | 0 | 0 | 1 |  |
| *bla*TEM + *bla*SHV + *aac(6’)-Ib-cr+ qnrS + oqxA + oqxB* | 1 | 0 | 0 | 1 |  |
| *bla*CTX-M + *aac(6’)-Ib-cr+ qnrB* | 0 | 1 | 0 | 1 |  |
| *bla*CTX-M + *aac(6’)-Ib-cr+ qnrB + qnrS + oqxA* | 0 | 0 | 1 | 1 |  |
| *bla*CTX-M + *aac(6’)-Ib-cr+ qnrS* | 1 | 0 | 0 | 1 |  |
| *bla*CTX-M + *bla*SHV + *aac(6’)-Ib-cr+ oqxA + oqxB* | 1 | 1 | 0 | 2 |  |
| *bla*CTX-M + *bla*SHV + *aac(6’)-Ib-cr+ qnrB + oqxA* | 0 | 0 | 1 | 1 |  |
| *bla*CTX-M + *bla*SHV + *aac(6’)-Ib-cr+ qnrS + oqxA* | 0 | 1 | 0 | 1 |  |
| *bla*CTX-M + *bla*SHV + *aac(6’)-Ib-cr+ qnrS + oqxA + oqxB* | 0 | 2 | 0 | 2 |  |
| *bla*CTX-M + *bla*SHV + *oqxA + oqxB* | 1 | 0 | 0 | 1 |  |
| *bla*CTX-M + *bla*SHV + *qnrB + oqxA + oqxB* | 1 | 0 | 0 | 1 |  |
| *bla*CTX-M + *bla*TEM + *aac(6’)-Ib-cr+ oqxA* | 1 | 0 | 2 | 3 |  |
| *bla*CTX-M + *bla*TEM + *aac(6’)-Ib-cr+ oqxA + oqxB* | 1 | 0 | 0 | 1 |  |
| *bla*CTX-M + *bla*TEM + *aac(6’)-Ib-cr+ oqxB* | 0 | 0 | 1 | 1 |  |
| *bla*CTX-M + *bla*TEM + *aac(6’)-Ib-cr+ qnrB* | 1 | 0 | 3 | 4 |  |
| *bla*CTX-M + *bla*TEM + *aac(6’)-Ib-cr+ qnrB + oqxA* | 0 | 0 | 1 | 1 |  |
| *bla*CTX-M + *bla*TEM + *aac(6’)-Ib-cr+ qnrB + oqxA + oqxB* | 0 | 1 | 0 | 1 |  |
| *bla*CTX-M + *bla*TEM + *aac(6’)-Ib-cr+ qnrB + oqxA + oqxB + qepA* | 0 | 1 | 0 | 1 |  |
| *bla*CTX-M + *bla*TEM + *aac(6’)-Ib-cr+ qnrB + oqxB* | 2 | 3 | 0 | 5 |  |
| *bla*CTX-M + *bla*TEM + *aac(6’)-Ib-cr+ qnrS + oqxB* | 1 | 0 | 0 | 1 |  |
| *bla*CTX-M + *bla*TEM + *bla*SHV + *aac(6’)-Ib-cr+ oqxA* | 0 | 1 | 1 | 2 |  |
| *bla*CTX-M + *bla*TEM + *bla*SHV + *aac(6’)-Ib-cr+ oqxA + oqxB* | 1 | 0 | 1 | 2 |  |
| *bla*CTX-M + *bla*TEM + *bla*SHV + *aac(6’)-Ib-cr+ qnrB* | 1 | 0 | 0 | 1 |  |
| *bla*CTX-M + *bla*TEM + *bla*SHV + *aac(6’)-Ib-cr+ qnrB + oqxA* | 3 | 1 | 2 | 6 |  |
| *bla*CTX-M + *bla*TEM + *bla*SHV + *aac(6’)-Ib-cr+ qnrB + oqxA + oqxB* | 1 | 0 | 0 | 1 |  |
| *bla*CTX-M + *bla*TEM + *bla*SHV + *aac(6’)-Ib-cr+ qnrB + oqxB* | 1 | 1 | 0 | 2 |  |
| *bla*CTX-M + *bla*TEM + *bla*SHV + *aac(6’)-Ib-cr+ qnrS* | 0 | 0 | 1 | 1 |  |
| *bla*CTX-M + *bla*TEM + *bla*SHV + *aac(6’)-Ib-cr+ qnrS + oqxA* | 3 | 1 | 0 | 4 |  |
| *bla*CTX-M + *bla*TEM + *bla*SHV + *aac(6’)-Ib-cr+ qnrS + oqxA + oqxB* | 1 | 4 | 0 | 5 |  |
| *bla*CTX-M + *bla*TEM + *bla*SHV + *oqxB* | 0 | 0 | 1 | 1 |  |
| *bla*CTX-M + *bla*TEM + *bla*SHV + *qnrB + oqxA* | 0 | 0 | 3 | 3 |  |
| *bla*CTX-M + *bla*TEM + *bla*SHV + *qnrB + oqxA + oqxB* | 1 | 0 | 0 | 1 |  |
| *bla*CTX-M + *bla*TEM + *bla*SHV + *qnrS + oqxA + oqxB* | 0 | 1 | 0 | 1 |  |
| *bla*CTX-M + *bla*TEM + *oqxA* | 0 | 0 | 2 | 2 |  |
| *bla*CTX-M + *bla*TEM + *oqxA + oqxB* | 0 | 0 | 2 | 2 |  |
| *bla*CTX-M + *bla*TEM + *oqxB* | 0 | 0 | 1 | 1 |  |
| *bla*CTX-M + *bla*TEM + *qnrB + oqxA* | 0 | 0 | 1 | 1 |  |
| *bla*CTX-M + *bla*TEM + *qnrB + qnrS* | 0 | 0 | 1 | 1 |  |
| *bla*CTX-M + *bla*TEM + *qnrS + oqxA + oqxB* | 0 | 0 | 1 | 1 |  |
| *bla*CTX-M + *bla*TEM + *qnrS + oqxB* | 0 | 2 | 0 | 2 |  |
| *bla*CTX-M + *qnrB + oqxB* | 0 | 0 | 1 | 1 |  |
| *bla*CTX-M + *qnrS + oqxA* | 0 | 0 | 2 | 2 |  |

| Targeted genes | Primers names | Sequence (5’-3’) | Amplicon size (bp) | | Annealing Temp. | | Ref. |
| --- | --- | --- | --- | --- | --- | --- | --- |
| *bla*CTX-M | CTX-MU1  CTX-MU2 | CGATGTGCAGTACCAGTAA  TTAGTGACCAGAATCAGCGG | | 585 | | 47 °C | [1] |
| *bla*TEM | TEM-F  TEM-R | CATTTCCGTGTCGCCCTTATTC  CCAATGCTTAATCAGTGAGGC | | 846 | | 47 °C | [2] |
| *bla*SHV | SHV-F  SHV-R | AGCCGCTTGAGCAAATTAAAC  GTTGCCAGTGCTCGATCAGC | | 786 | | 58.8 °C | [2] |
| *qnr*A | *qnrA*-F  *qnrA* -R | ATTTCTCACGCCAGGATTTG  GATCGGCAAAGGTTAGGTCA | | 516 | | 55 °C | [3] |
| *qnr*B | *qnr*B-F  *qnr*B -R | GATCGTGAAAGCCAGAAAGG  ACGATGCCTGGTAGTTGTCC | | 469 | | 55 °C | [3] |
| *qnr*S | *qnr*S-F  *qnr*S -R | ACGACATTCGTCAACTGCAA  TAAATTGGCACCCTGTAGGC | | 417 | | 55 °C | [3] |
| *aac(6')-Ib-cr* | *aac(6')-Ib-*F  *aac(6')-Ib*-R | TTGCGATGCTCTATGAGTGGCTA  CTCGAATGCCTGGCGTGTTT | | 482 | | 48 °C | [4] |
| *oqx*A | *oqx*A-F  *oqx*A-R | CTCGGCGCGATGATGCT  CCACTCTTCACGGGAGACGA | | 392 | | 56 °C | [5] |
| *oqx*B | *oqx*B-F  *oqx*B-R | TTCTCCCCCGGCGGGAAGTAC  CTCGGCCATTTTGGCGCGTA | | 512 | | 48 °C | [5] |
| *qep*A | *qep*A-F  *qep*A-R | GCAGGTCCAGCAGCGGGTAG  CTTCCTGCCCGAGTATCGTG | | 199 | | 57 °C | [6] |
| ERIC | ERIC 1F  ERIC 2R | ATGTAAGCTCCTGGGGATTCAC AAGTAAGTGACTGGGGTGAGCG | | variable | | 60 °C | [7] |

**Supplementary Table S7:** List of primers used for the detection of resistance genes and clonal relatedness.

bp=base pair, Temp=Temperature, Ref=Reference.


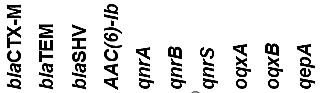

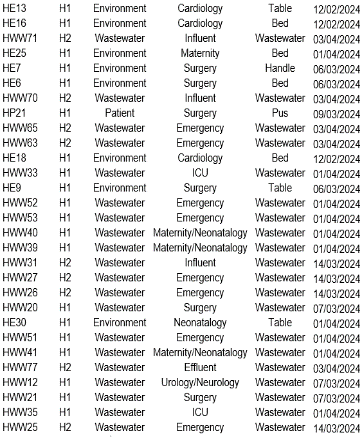

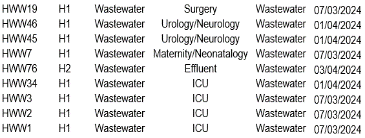

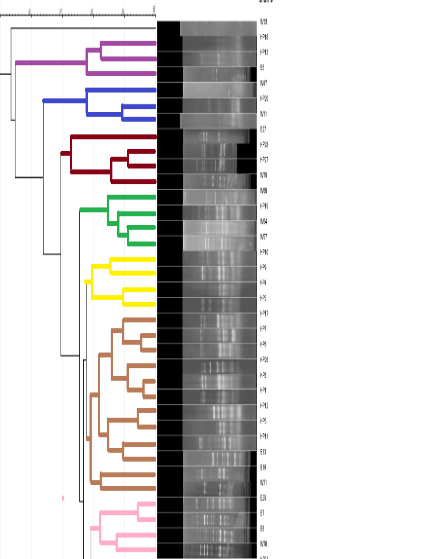

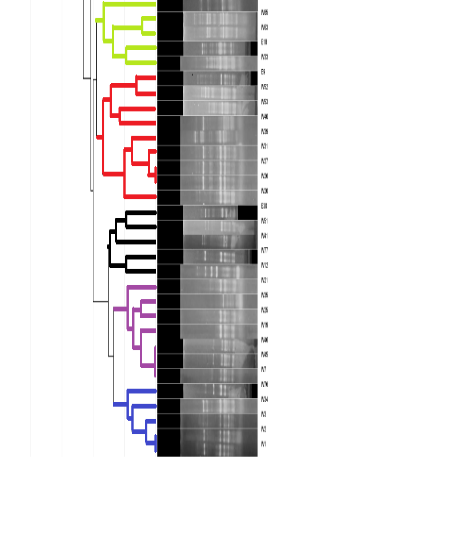

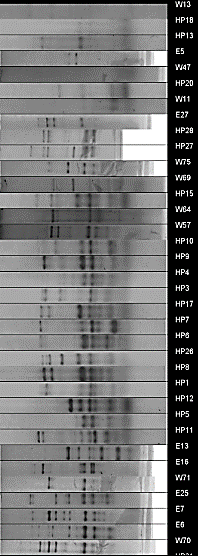

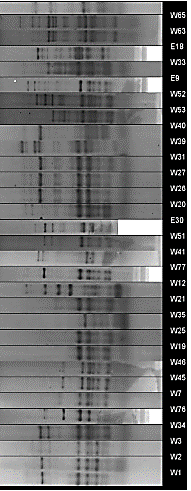

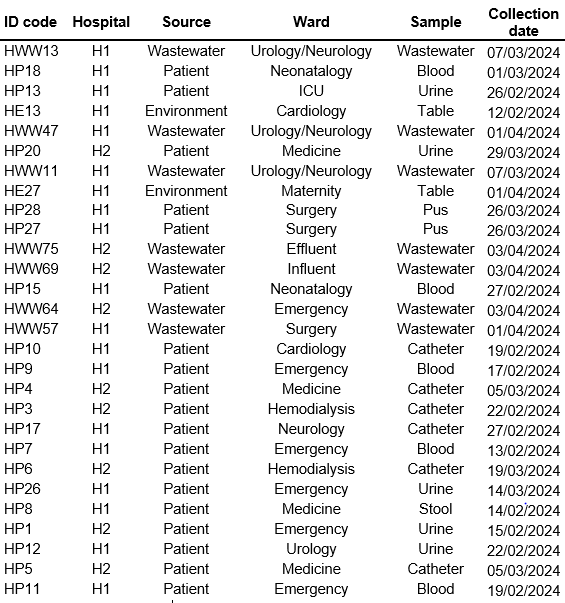

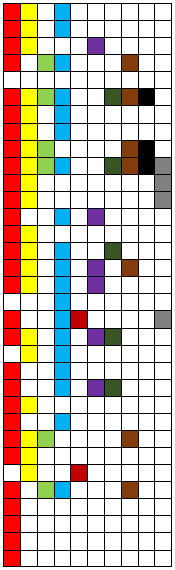

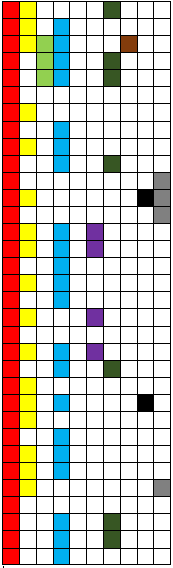


E1

E2

E3

E4

E5

E6

E7

E8

E9

E10

E11

E12

**Figure 9:** Genetic relatedness of ESBL-E. coli (n=66) isolated from hospitalized patients,

the hospital environment and wastewaters of two healthcare centers of Yaoundé, Cameroon.

H1=Yaoundé Central Hospital, H2=Yaoundé University Teaching Hospital, ICU=Intensive Care Unit

**References**

[1]. Batchelor M, Hopkins K, Threlfall EJ, Clifton-Hadley FA, Stallwood AD, Davies RH, et al. bla(CTX-M) genes in clinical Salmonella isolates recovered from humans in England and Wales from 1992 to 2003. Antimicrob Agents Chemother. 2005;49(4):1319-22.

[2]. Strauß LM, Dahms C, Becker K, Kramer A, Kaase M, Mellmann A. Development and evaluation of a novel universal β-lactamase gene subtyping assay for blaSHV, blaTEM and blaCTX-M using clinical and livestock-associated Escherichia coli. J Antimicrob Chemother. 2015;70(3):710-5.

[3]. Robicsek A, Strahilevitz J, Sahm DF, Jacoby GA, Hooper DC. qnr prevalence in ceftazidime-resistant Enterobacteriaceae isolates from the United States. Antimicrob Agents Chemother. 2006;50(8):2872-4.

[4]. Park CH, Robicsek A, Jacoby GA, Sahm D, Hooper DC. Prevalence in the United States of aac(6')-Ib-cr encoding a ciprofloxacin-modifying enzyme. Antimicrob Agents Chemother. 2006;50(11):3953-5.

[5]. Kim HB, Wang M, Park CH, Kim EC, Jacoby GA, Hooper DC. oqxAB encoding a multidrug efflux pump in human clinical isolates of Enterobacteriaceae. Antimicrob Agents Chemother. 2009;53(8):3582-4.

[6]. Yamane K, Wachino J, Suzuki S, Arakawa Y. Plasmid-mediated qepA gene among Escherichia coli clinical isolates from Japan. Antimicrob Agents Chemother. 2008;52(4):1564-6.

[7]. Dimani BD, Founou RC, Zemtsa JR, Mbossi A, Koudoum PL, Founou LL, et al. Faecal carriage of multidrug-resistant and extended-spectrum β-lactamase-producing Enterobacterales in people living with HIV in Yaoundé, Cameroon. Journal of Global Antimicrobial Resistance. 2023;35:26-34.
